includes such subjects as the effect of low temperatures on intracellular potassium in isolated tissues, electrolyte transfer during hypothermia, and the gas transport system in hypothermia. Part 2, *The Effect of Hypothermia on Specific Systems*, essentially cardiovascular, endocrine, renal, liver and nervous system. Part 3, *Myocardial Irritability and Hypothermia*, has to do largely with isolated tissues, but also with intact animals. Part 4, *Clinical Application of Induced Hypothermia*; and Part 5, *Techniques of Inducing Hypothermia*. The subject is covered as well as could possibly have been expected. The style of writing differs somewhat between the different authors, but in general the material is especially well organized and presented. A valuable feature is the objective and critical review and appraisal of each section of the book by men versed in that particular field. There is no other source available where so much information in this field can be found. Where knowledge is missing, that fact has been indicated. The book is well bound, and is made of good quality paper and easily readable print.

ROBERT W. VIRTUE, M.D.

**First Edition of Selected Scientific Papers and Addresses of Ralph Milton Waters, M.D.** Published as a tribute to Ralph Milton Waters, M.D., by Richard Foregger and the Foregger Company, Inc. Paper \$4. Pp. 158. Reproduced and bound by Office Services, Western Reserve University for the program honoring Dr. Waters, June 12, 1957.

Rarely has the field of anesthesiology been blessed with contributions of one man so basic, practical and far-reaching in scope than those of Doctor Ralph M. Waters. His investigations and reflections have been bound on the occasion of a special program commemorating the awarding to him of the honorary degree of Doctor of Science by Western Reserve University last June upon his fiftieth anniversary of graduation. The supply of bound volumes is very limited.

The collection of papers represents the life-span and endless effort of America's greatest pioneer in anesthesia. His foresight, fearlessness, keen and early appreciation of laboratory studies, above all, his unexcelled ability to make clinical application of basic principles are clearly exemplified in his writings. Stimulating to his students as he undoubtedly was, his papers demonstrate an enviable balance of idealism and realism in the practice of anesthesia.

The paper bound volume of 44 papers is appropriately prefaced with an Introduction relating the birthplace and early educational background of Doctor Waters—all in Ohio—and concluding with an illustration of a bronze tablet itemizing a few of Doctor Waters' more significant contributions and honors.

The long list of Doctor Waters' investigations and addresses is not printed in chronological order. There is no contents or index in the volume. Significantly, the list begins with "Pioneering in Anesthesiology," published in 1948, which represents a very modest biography of Doctor Waters. The wealth of experience gained as a general practitioner, as well as the various influences which confirmed his "vision" of anesthesia, are related in a simple, direct, sincere and forceful manner. For these reasons, if for none other, this historic writing should be read by all anesthesiologists. Equally instructive is the second paper in the volume entitled, "Why the Professional Anesthetist."

The rest of the bound volume is enriched with other addresses and particularly with laboratory and clinical investigations of fundamental import. Of especial significance are Doctor Waters' basic studies on "Clinical Scope and Utility of Carbon Dioxide Filtration in Inhalation Anesthesia," "Endotracheal Anesthesia: A New Technic," "Cyclopropane Anesthesia" and numerous papers on to- and- fro anesthesia, oxygen want, carbon dioxide, and respiratory resuscitation.

Although Doctor Waters' dissertations may appear to some to be of only historic interest, the fact remains that they embody fundamental principles and basic clinical applications still valid and valuable today. The bound volume of Doctor Waters' studies, reflections, and reactions is memorable and priceless.

STEVENS J. MARTIN, M.D.
